# Supplementary material
Source: PubMed Central journal article supplement (PMC3492904)

Figure S1

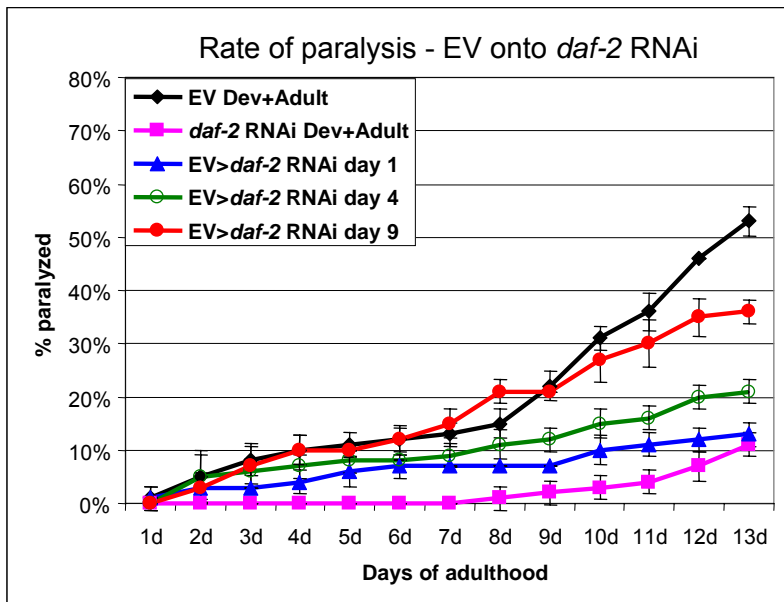

Figure S2

**EV for life vs *daf-2* RNAi for life**

| Group              | N   | N Censored | Mean lifespan (days) | Std Error |
|--------------------|-----|------------|----------------------|-----------|
| EV (life)          | 81  | 19         | 15.481               | 0.432     |
| <i>daf2</i> (life) | 77  | 23         | 23.736               | 0.737     |
| Combined           | 158 | 42         | 19.523               | 0.533     |

| Test     | ChiSquare | DF | P value  |
|----------|-----------|----|----------|
| Log-Rank | 77.463    | 1  | 1.35E-18 |
| Wilcoxon | 68.146    | 1  | 1.52E-16 |

**EV for life vs *daf-2* RNAi from day 9 of adulthood**

| Group                    | N   | N Censored | Mean lifespan (days) | Std Error |
|--------------------------|-----|------------|----------------------|-----------|
| EV (life)                | 81  | 19         | 15.481               | 0.432     |
| <i>daf-2</i> (from day9) | 86  | 14         | 15.353               | 0.443     |
| Combined                 | 167 | 33         | 15.414               | 0.309     |

| Test     | ChiSquare | DF | P value    |
|----------|-----------|----|------------|
| Log-Rank | 3E-05     | 1  | 0.99552687 |
| Wilcoxon | 0.0836    | 1  | 0.7725386  |

***daf-2* RNAi for life vs *daf-2* RNAi from day 5 of adulthood**

| Group                    | N   | N Censored | Mean lifespan (days) | Std Error |
|--------------------------|-----|------------|----------------------|-----------|
| <i>daf-2</i> (from day5) | 75  | 25         | 17.04                | 0.612     |
| <i>daf-2</i> (life)      | 77  | 23         | 23.736               | 0.737     |
| Combined                 | 152 | 48         | 20.452               | 0.549     |

| Test     | ChiSquare | DF | P value  |
|----------|-----------|----|----------|
| Log-Rank | 40.143    | 1  | 2.36E-10 |
| Wilcoxon | 34.857    | 1  | 3.55E-09 |

Figure S3

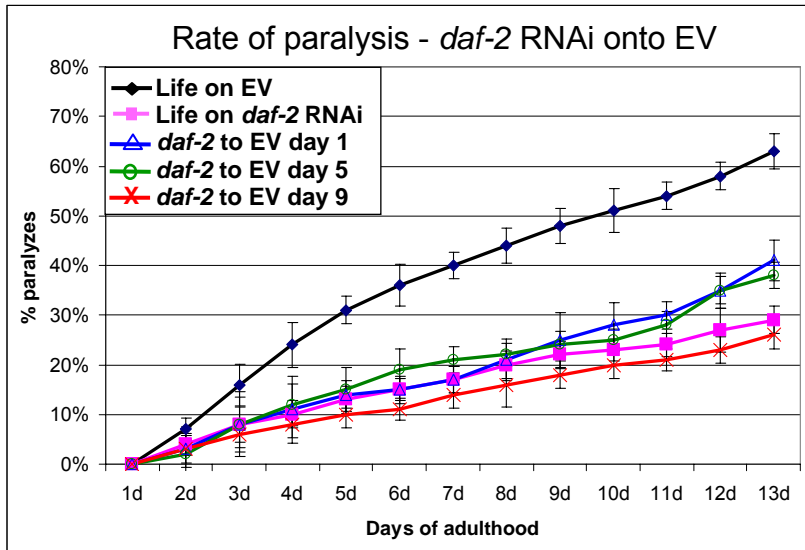

Figure S4

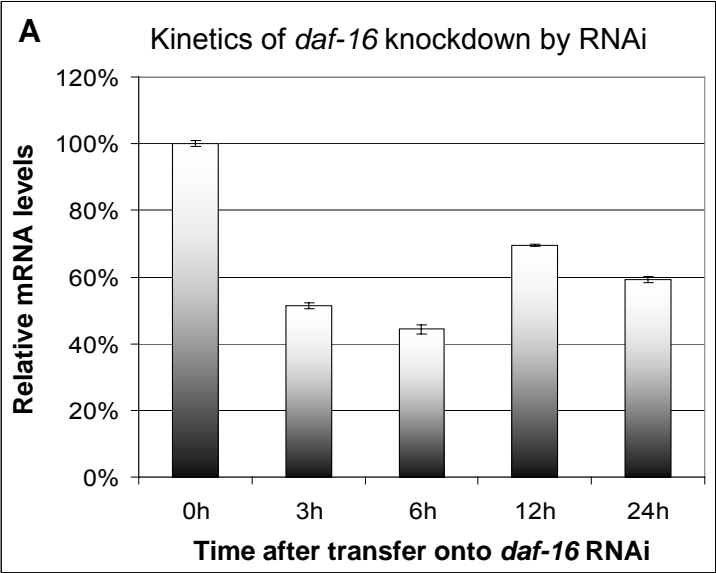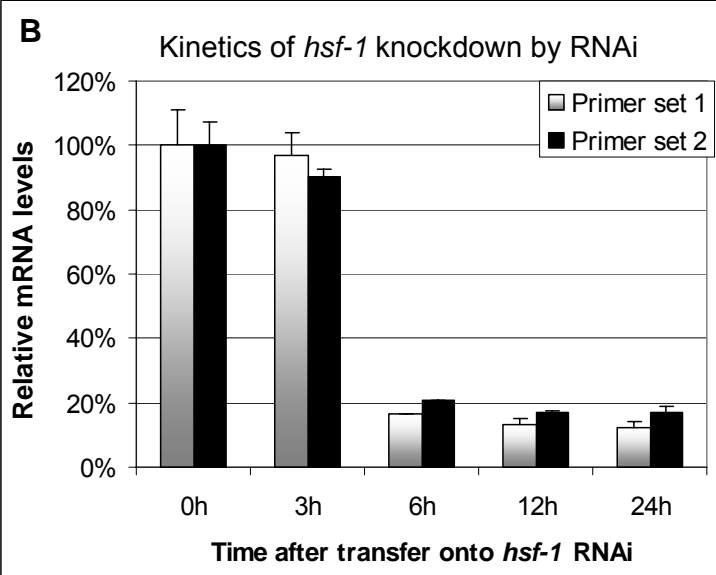

Figure S5

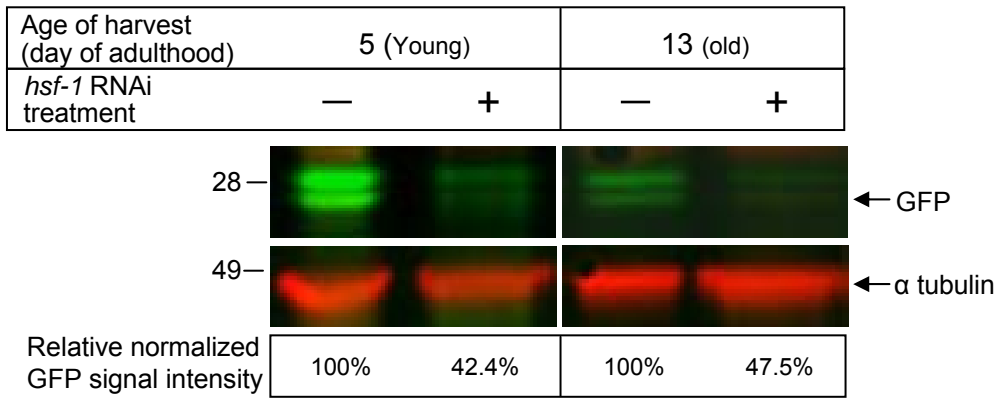

Supplement: acel0009-0126-SD1.pdf [file acel0009-0126-SD1.pdf]
